# Supplementary material for: Comparison of differences in the flame retardancy of cotton fabrics caused by the introduction of cyclic polysiloxane into P/N organic coatings
Source: Royal Society of Chemistry journal article supplement (doi:10.1039/d1nj01976g), 2021-01-01
Supplement: d1nj01976g1.pdf [file d1nj01976g1.pdf]

**Comparison of differences in flame retardancy of cotton fabrics caused by the introduction of cyclic polysiloxane into P/N organic coatings**

Zheng Zhang, Shuai Wang, Chaohong Dong\*, Jian Liu, Dezheng Kong, Heng Sun and Zhou Lu\*

College of Chemistry and Chemical Engineering, College of Textile and Clothing, Institute of Functional Textiles and Advanced Materials, State Key Laboratory of Bio-fibers and Eco-textiles, Qingdao University, Qingdao 266071, China

\*Corresponding author: Z. Lu (E-mail: yudija@163.com), C. Dong (E-mail: dongzh11@163.com)

Zheng Zhang and Shuai Wang contributed equally to this work

**Table S1** The weight gain, flame retardancy and mechanical performance parameters of the samples

| Sample        | WG (%) | LOI (%) | Afterflame time (s) | Afterglow time (s) | Char length (cm) | tensile strength |      | Whiteness |
|---------------|--------|---------|---------------------|--------------------|------------------|------------------|------|-----------|
|               |        |         |                     |                    |                  | Warp             | Weft |           |
| Control       | 0      | 18      | 17.6                | 18.5               | -                | 474              | 440  | 81.1      |
| ASPP cot-1    | 9.7    | 29.8    | 0                   | 0                  | 9.0              |                  |      |           |
| ASPP cot-2    | 12.8   | 30.8    | 0                   | 0                  | 7.2              |                  |      |           |
| ASPP cot-3    | 16.5   | 32.4    | 0                   | 0                  | 6.5              | 507              | 411  | 73.8      |
| ASPP-Si cot-1 | 8.9    | 27.3    | 0                   | 0                  | 10.3             |                  |      |           |
| ASPP-Si cot-2 | 13.1   | 29.3    | 0                   | 0                  | 9.8              |                  |      |           |
| ASPP-Si cot-3 | 17.3   | 31.1    | 0                   | 0                  | 7.3              | 527              | 453  | 77.8      |
| 10% PBTCA-cot |        | 19.2    | 3.1                 | 1.0                | -                |                  |      |           |

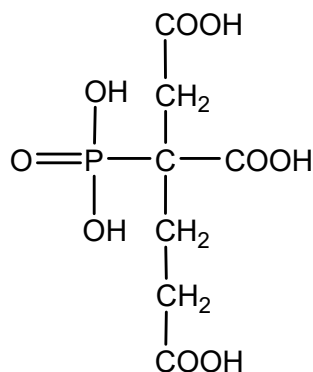

**Fig. S1** Structure of PBTCA

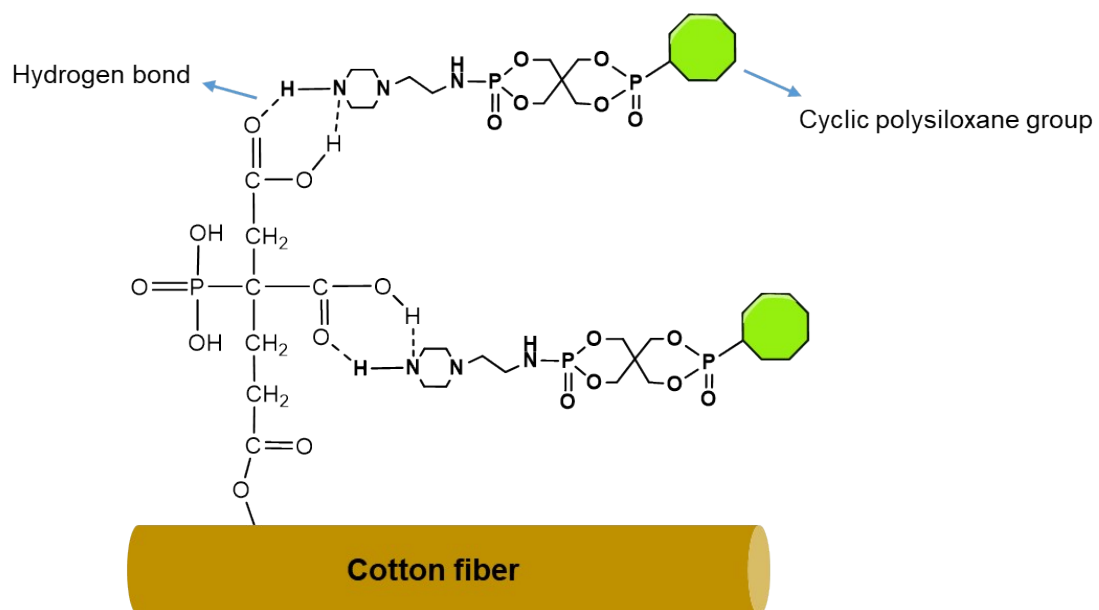

**Fig. S2** Reaction of cotton fabric with flame retardant by PBTCA

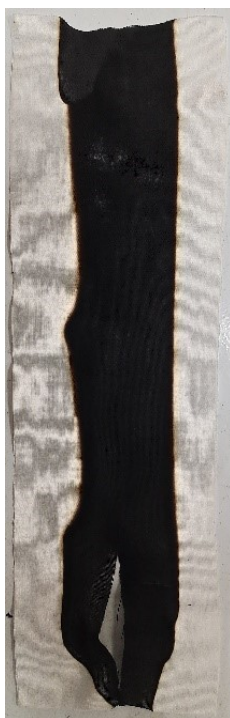

**Fig. S3** Photos of treated cotton fabrics with 10% PBTCA after vertical flammability test

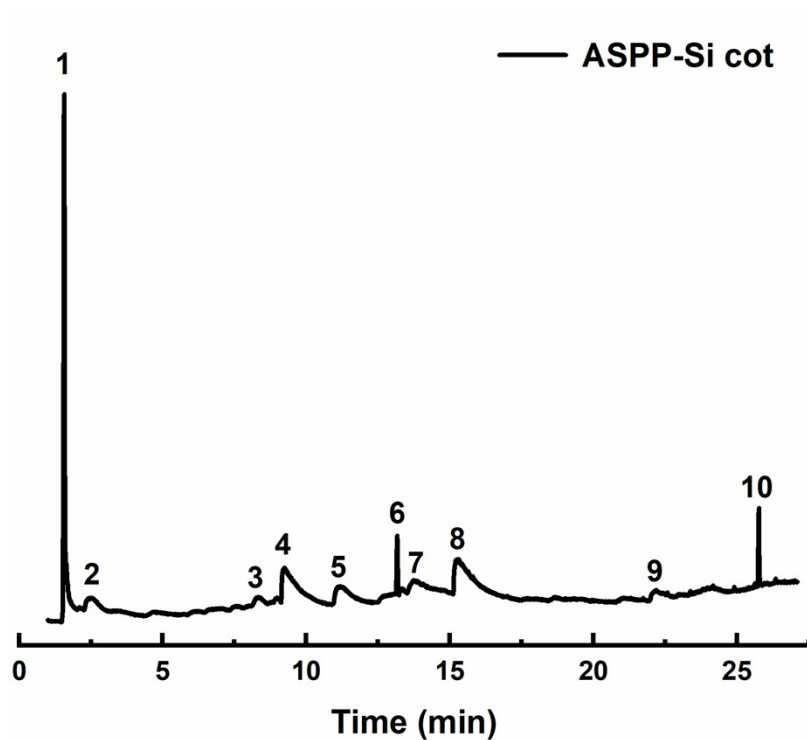

**Fig. S4** The total ion chromatogram of ASPP-cot in Py-GC-MS tests at 350 °C

**Table S2** Possible pyrolytic products of ASPP-Si cot at 350 °C

| Peak | Retention time (min) | MW  | Assigned structure                                                                    |
|------|----------------------|-----|---------------------------------------------------------------------------------------|
| 1    | 1.57                 | 89  | 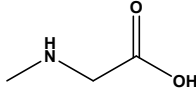 |
| 2    | 2.41                 | 82  |  |
| 3    | 8.30                 | 110 |   |
| 4    | 9.20                 | 126 |  |
| 5    | 11.13                | 216 |  |

|    |       |     |                                                                                     |
|----|-------|-----|-------------------------------------------------------------------------------------|
| 6  | 13.17 | 536 | 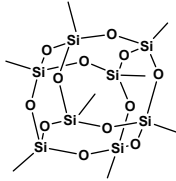 |
| 7  | 13.72 | 172 |   |
| 8  | 15.22 | 162 |   |
| 9  | 22.12 | 228 |   |
| 10 | 25.76 | 410 |   |

**Table S3** LOI value of treated cotton fabrics after washing

| Washing times | 0    | 5    | 10   | 15   | 20   |
|---------------|------|------|------|------|------|
| ASPP cot-3    | 32.4 | 29.5 | 27.0 | 25.7 | 24.8 |
| ASPP-Si cot-3 | 31.1 | 28.8 | 26.7 | 25.5 | 24.5 |

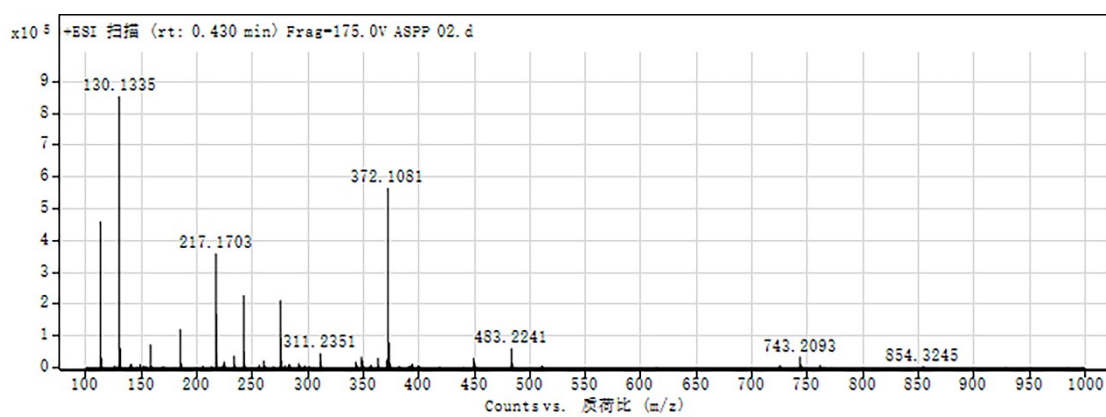

**Fig. S5** The ESI mass spectrum of ASPP (positive mode)

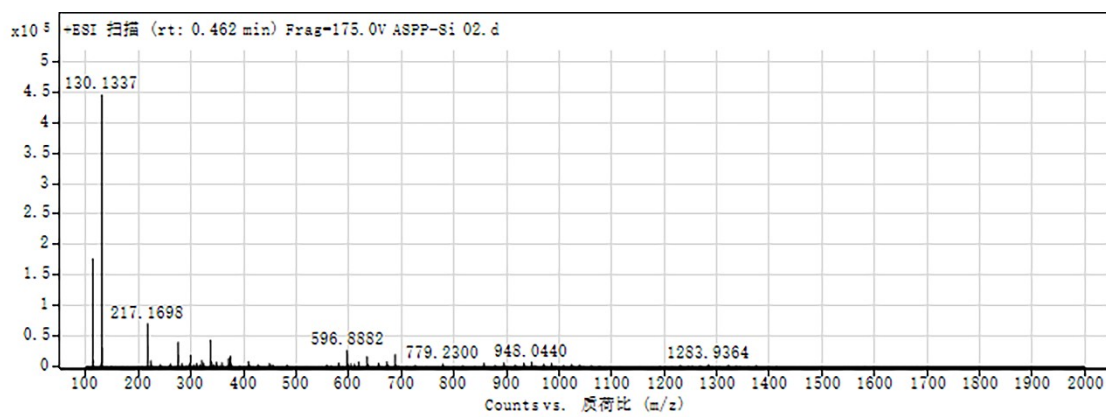

**Fig. S6** The ESI mass spectrum of ASPP-Si (positive mode)
